# Supplementary material for: Dual Passivation of Perovskite and SnO2 for High‐Efficiency MAPbI3 Perovskite Solar Cells
Source: PubMed Central journal article supplement (PMC7927604; doi:10.1002/advs.202001466), 2021-01-29
Supplement: ADVS-8-2001466-s001.pdf [file ADVS-8-2001466-s001.pdf]

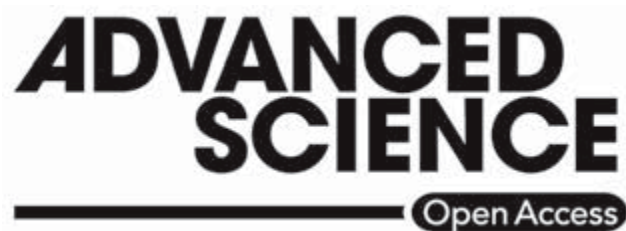

## Supporting Information

for *Adv. Sci.*, DOI: 10.1002/adv.202001466

Dual Passivation of Perovskite and SnO<sub>2</sub> for High-efficiency MAPbI<sub>3</sub> Perovskite Solar Cells

*Yali Chen, Xuejiao Zuo, Yiyang He, Fang Qian, Shengnan Zuo, Yalan Zhang, Lei Liang, Zuqin Chen, Kui Zhao, Zhike Liu, Jing Gou\*, and Shengzhong (Frank) Liu\**

## Supporting Information

### Dual Passivation of perovskite and SnO<sub>2</sub> for high-efficiency MAPbI<sub>3</sub> perovskite solar cells

*Yali Chen, Xuejiao Zuo, Yiyang He, Fang Qian, Shengnan Zuo, Yalan Zhang, Lei Liang, Zuqin Chen, Kui Zhao, Zhike Liu, Jing Gou\*, and Shengzhong (Frank) Liu\**

Y. Chen, X. Zuo, Y. He, F. Qian, S. Zuo, Y. Zhang, L. Liang, Z. Chen, Prof. K. Zhao, Prof. Z. Liu, Prof. J. Gou, Prof. S. (F.) Liu

Key Laboratory of Applied Surface and Colloid Chemistry

Ministry of Education

Shaanxi Key Laboratory for Advanced Energy Devices

Shaanxi Engineering Lab for Advanced Energy Technology

School of Materials Science and Engineering

Shaanxi Normal University

Xi'an 710119, China.

E-mail: [goujing@snnu.edu.cn](mailto:goujing@snnu.edu.cn); [liusz@snnu.edu.cn](mailto:liusz@snnu.edu.cn)

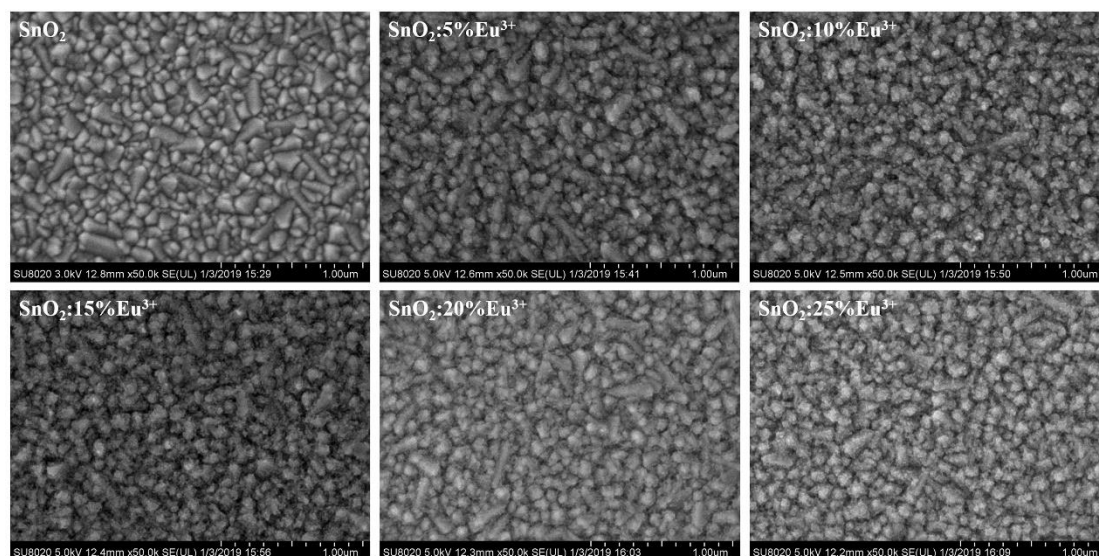

Fig. S1 The SEM images of SnO<sub>2</sub> and SnO<sub>2</sub>:Eu<sup>3+</sup> films.

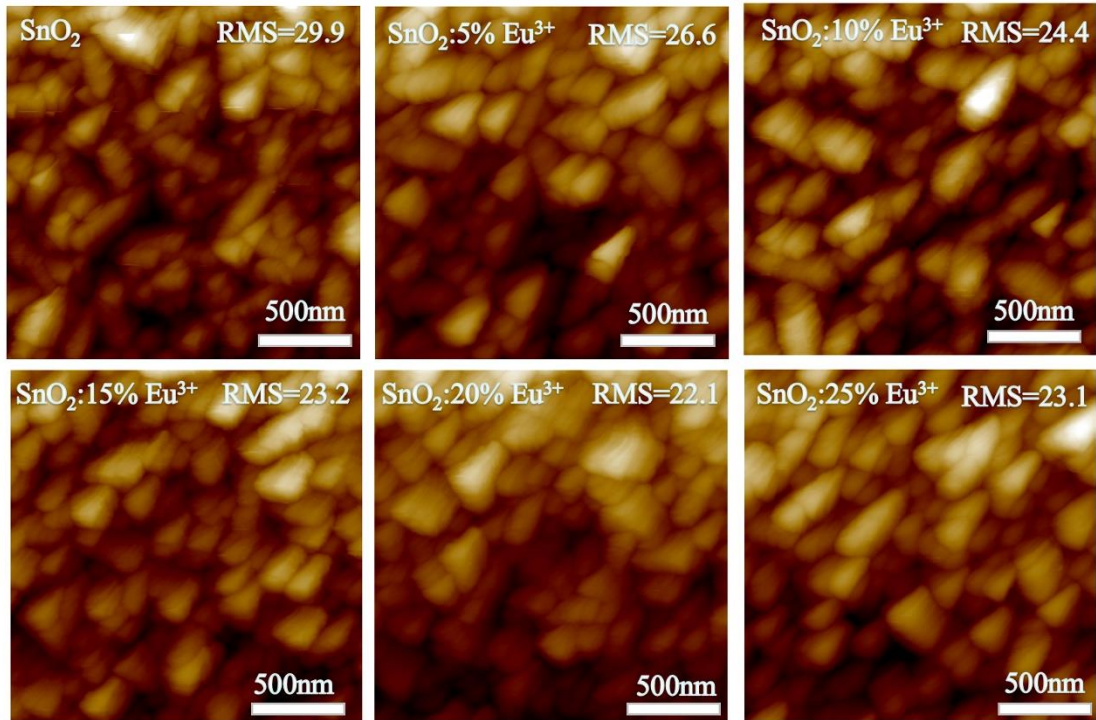

Fig. S2 Atomic force microscopy (AFM) images of SnO<sub>2</sub> and SnO<sub>2</sub>:Eu<sup>3+</sup> films deposited on FTO substrates

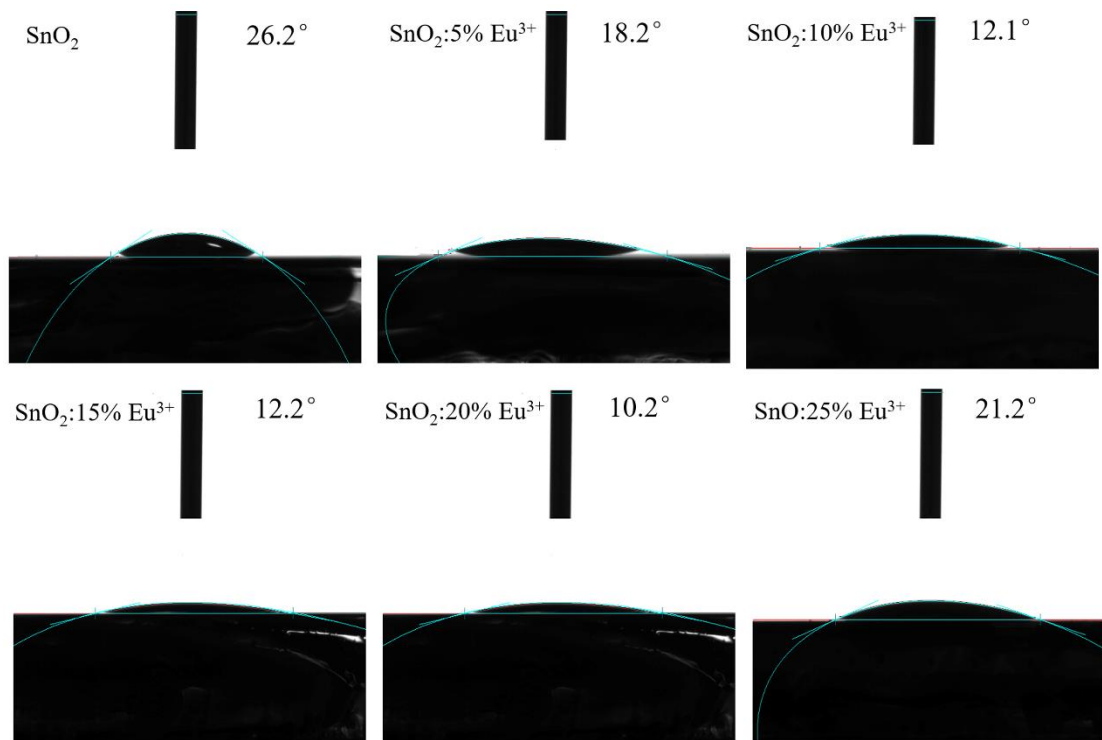

Fig. S3 The contact angles of SnO<sub>2</sub> and SnO<sub>2</sub>:Eu<sup>3+</sup> films.

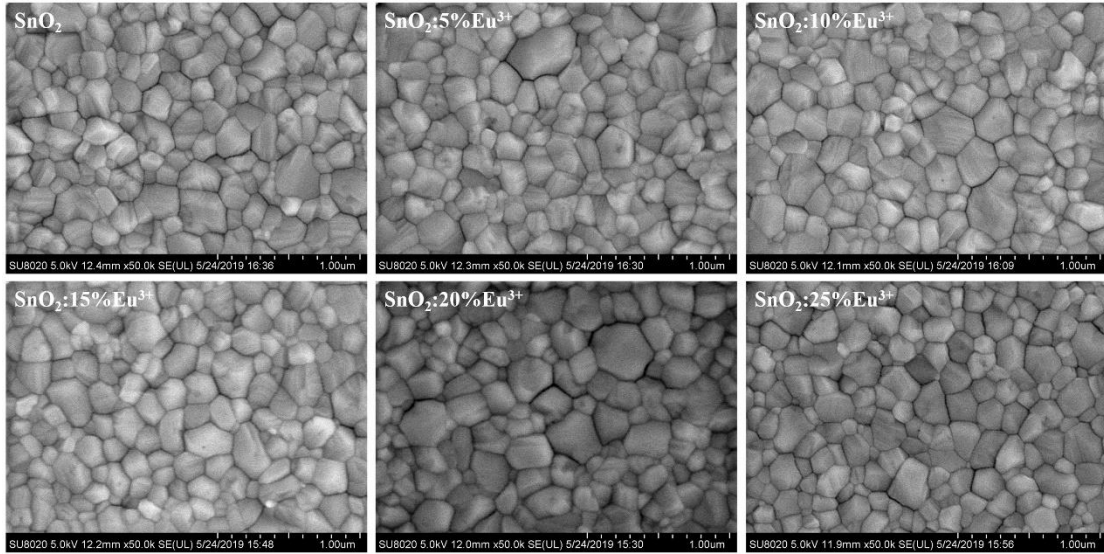

Fig. S4 The SEM images of perovskite films coated on  $\text{SnO}_2$  and  $\text{SnO}_2:\text{Eu}^{3+}$  films.

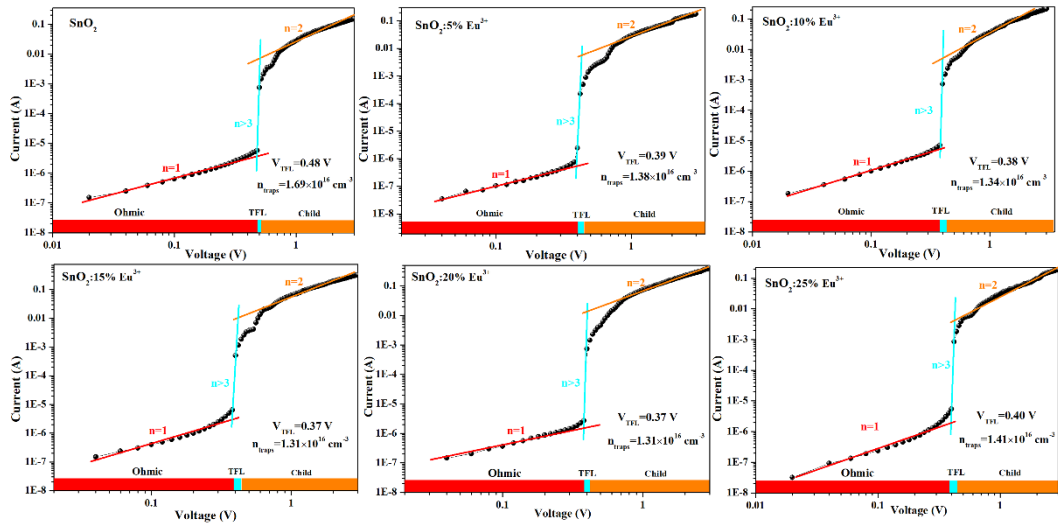

Fig. S5 Dark  $I$ - $V$  curves of the electron-only devices with different ETL

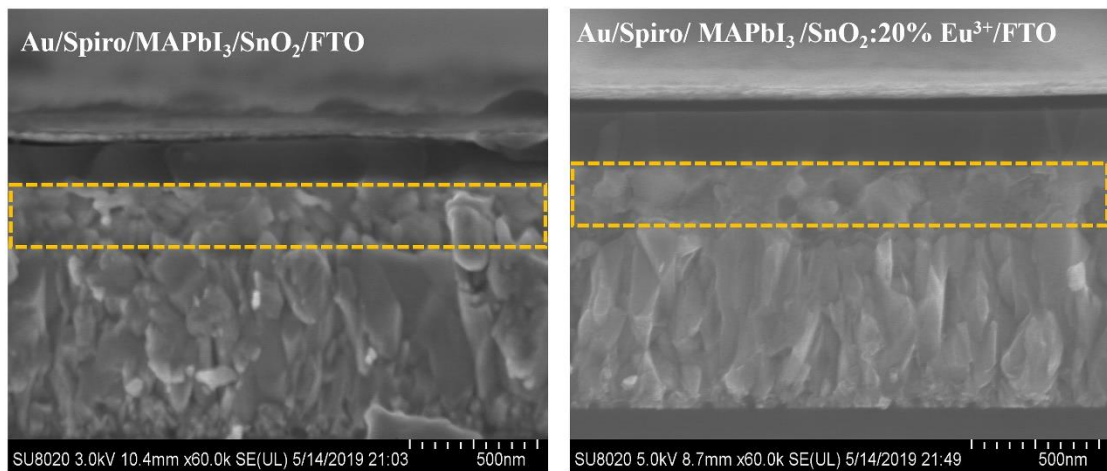

Fig. S6 The cross-sectional SEM images of PSCs with different ETL.

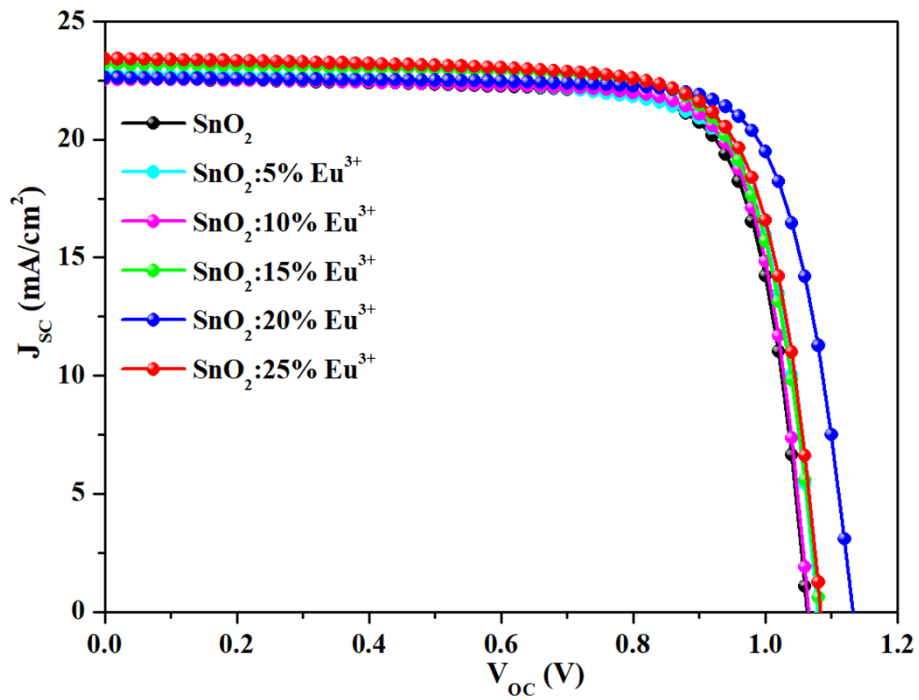

Fig.S7  $J$ - $V$  curves of the PSCs with different ETLs substrates.

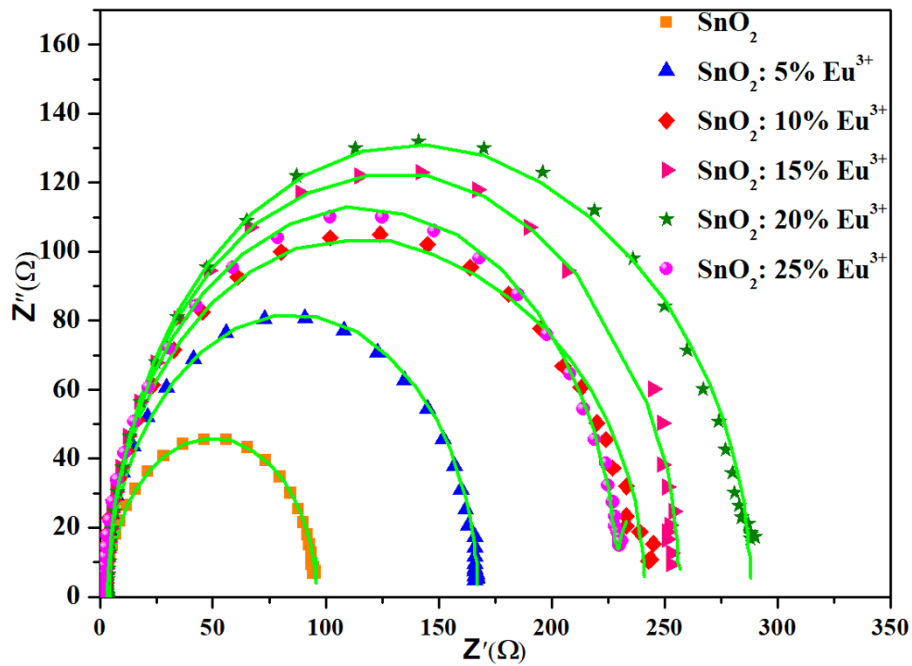

Fig.S8 EIS of planar-type PSCs with various ETLs.

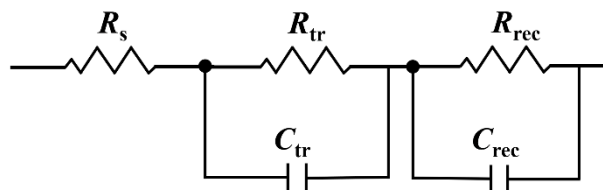

Fig.S9 Equivalent circuit in PSCs.

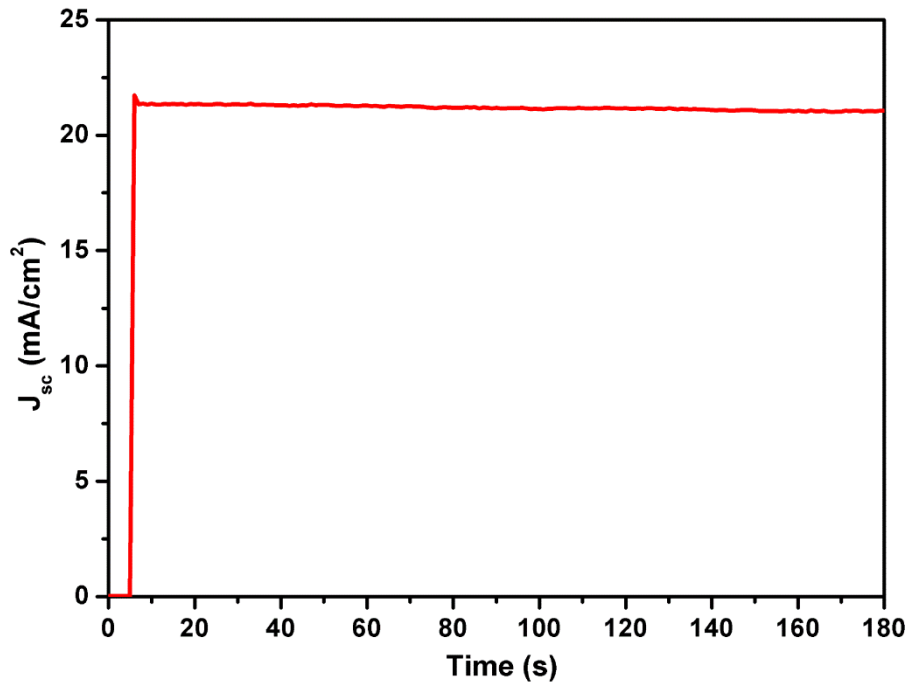

Fig.S10 Stable output curves of current densities of the device with  $\text{SnO}_2:\text{Eu}^{3+}$  at the maximum power point.

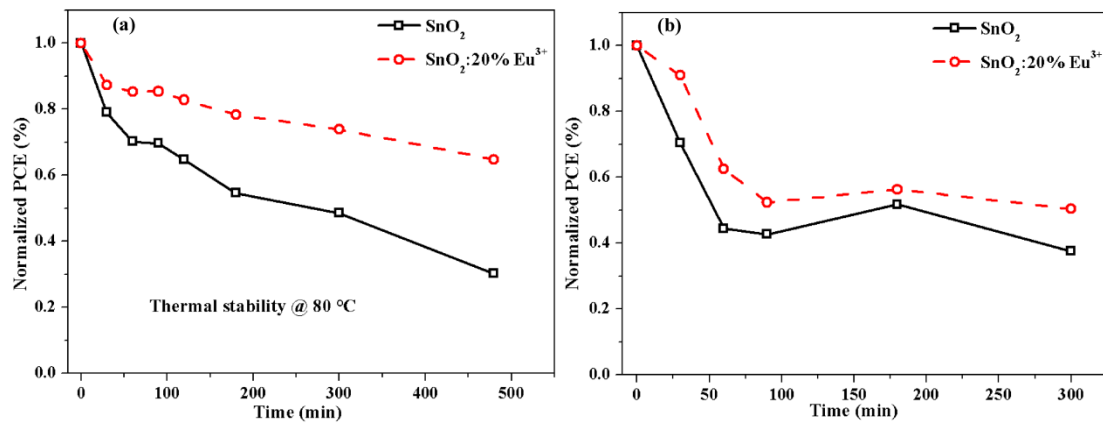

Fig.S11 Stability test for planar-type PSC devices with different ETLs without any encapsulation (a) at 80 °C in dry  $\text{N}_2$  atmosphere; (b) under  $100 \text{ mW cm}^{-2}$  illumination and 40-50% humidity at 60 °C.

**Supplementary Table 1** The average Hall coefficient, resistivity, mobility and carrier concentration of  $\text{SnO}_2$  and  $\text{SnO}_2:20\% \text{Eu}$  films.

| Sample                        | Average Hall coefficient ( $\text{cm}^3 \text{C}^{-1}$ ) | Resistivity ( $\Omega \cdot \text{cm}$ ) | Mobility ( $\text{cm}^2 \text{V}^{-1} \text{s}^{-1}$ ) | Carrier concentration ( $\text{cm}^{-3}$ ) |
|-------------------------------|----------------------------------------------------------|------------------------------------------|--------------------------------------------------------|--------------------------------------------|
| $\text{SnO}_2$                | $-2.59 \times 10^5$                                      | $6.24 \times 10^2$                       | $4.14 \times 10^2$                                     | $-2.41 \times 10^{13}$                     |
| $\text{SnO}_2:20\% \text{Eu}$ | $-3.18 \times 10^5$                                      | $3.36 \times 10^2$                       | $9.44 \times 10^2$                                     | $-1.97 \times 10^{13}$                     |

**Supplementary Table 2** Parameters of the TRPL spectra of perovskite films deposited on different substrates.

| Sample                                  | $\tau_{ave}$<br>(ns) | $\tau_1$<br>(ns) | % of $\tau_1$ | $\tau_2$<br>(ns) | % of $\tau_2$ |
|-----------------------------------------|----------------------|------------------|---------------|------------------|---------------|
| FTO/SnO <sub>2</sub> /Perovskite        | 35.20                | 4.38             | 39.5%         | 37.55            | 60.5%         |
| FTO/SnO <sub>2</sub> :5% Eu/Perovskite  | 17.45                | 3.94             | 33.08%        | 18.85            | 66.9%         |
| FTO/SnO <sub>2</sub> :10% Eu/Perovskite | 6.07                 | 2.93             | 43.59%        | 7.07             | 56.41%        |
| FTO/SnO <sub>2</sub> :15% Eu/Perovskite | 6.16                 | 2.76             | 38.71%        | 7.01             | 61.29%        |
| FTO/SnO <sub>2</sub> :20% Eu/Perovskite | 4.54                 | 7.65             | 13.05%        | 3.53             | 86.95%        |
| FTO/SnO <sub>2</sub> :25% Eu/Perovskite | 9.85                 | 3.04             | 36.32%        | 10.93            | 63.68%        |

**Supplementary Table 3** Parameters of PSCs deposited on different substrates.

| The amount of Eu <sup>3+</sup> in<br>SnO <sub>2</sub> :Eu <sup>3+</sup> (mol%) | $V_{oc}$<br>(V) | $J_{sc}$<br>(mA cm <sup>-2</sup> ) | FF    | PCE (%) |
|--------------------------------------------------------------------------------|-----------------|------------------------------------|-------|---------|
| 0                                                                              | 1.06            | 22.57                              | 77.77 | 18.66   |
| 5                                                                              | 1.07            | 22.75                              | 76.73 | 18.84   |
| 10                                                                             | 1.10            | 22.41                              | 76.77 | 19.08   |
| 15                                                                             | 1.10            | 22.25                              | 78.76 | 19.28   |
| 20                                                                             | 1.13            | 22.61                              | 78.76 | 20.14   |
| 25                                                                             | 1.08            | 23.41                              | 76.68 | 19.46   |
